# Supplementary material for: Wild Mushrooms: A Hidden Treasure of Novel Bioactive Compounds
Source: Preprints.org preprint supplement (doi:10.20944/preprints202307.1759.v1), 2023-07-26
Supplement: Supplementary file 3 [file supplementary]

| Table 6: Structure of GC-MS Analyzed Compounds Obtained from Five Wild Mushrooms | | | |
| --- | --- | --- | --- |
| Mushroom Spp. | Structure and Name of the Compounds | | |
| *auricula-judae* | 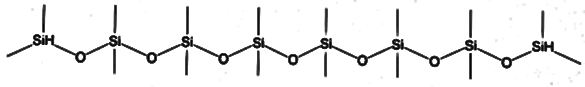  Octasiloxane, 1,1,3,3,5,5,7,7,9,9,11,11,13,13,15,15-hexadecamethyl- | 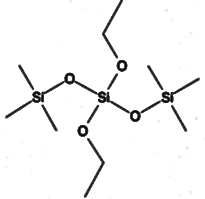  Silicic acid, diethyl bis(trimethylsilyl) ester | 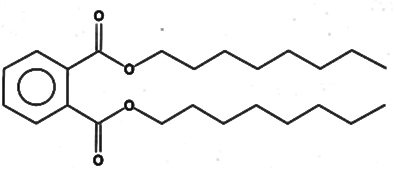  Di-n-octyl phthalate |
|  | 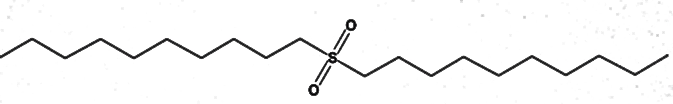  Di-n-decylsulfone | 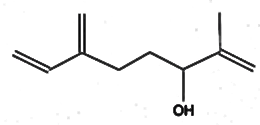  2-Methyl-6-methylene-octa-1,7-dien-3-ol | 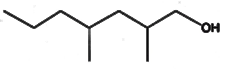  1-Heptanol, 2,4-dimethyl- (R, R)- (+)- |
|  | 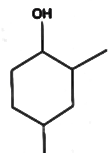  Cyclohexano, 2,4-dimethyl- | 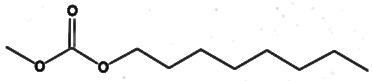  Carbonic acid, methyl octyl ester | 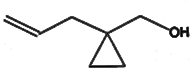  (1-Allylcyclopropyl) methanol |
|  | 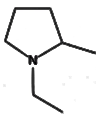  2-Methyl-1-ethylpyrrolidine | 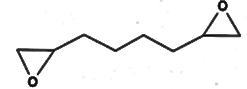  Oxirane, 2,2’-(1,4-dibutanediyl) bis- | 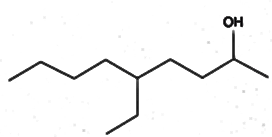  2-Nonanol, 5-ethyl- |
|  | 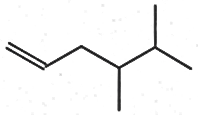  1-Hexene, 4, 5-dimthyl- | 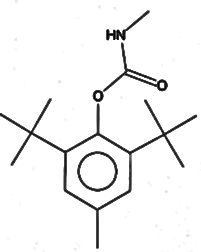  Phenol, 2,6-bis (1,1-dimethylethyl)-4-methyl-, methylcarbamate |  |
| *M. xanthopus* | 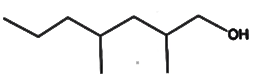  1-Heptanol, 2,4-dimethyl-, (2S, 4R) -(-)- | 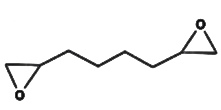  Oxirane, 2,2’-(1,4-butanediyl) bias- | 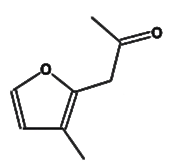  3-Methyl-2-(2-oxopropyl) furan |
|  | 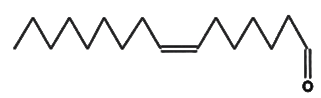  7-Hexadecenal, (Z)- | 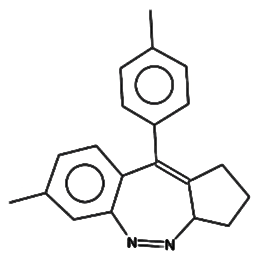  1,2,3,3a-Tetrahydro-7-methyl-10-4-methylphenyl) benzo [c] cyclopenta [f] -1,2-diazepine | 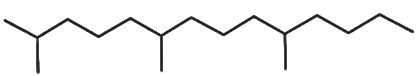  Tetradecane, 2,6,10-trimethyl- |
|  | 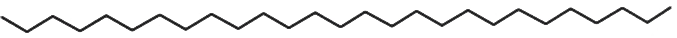  Heptacosane | 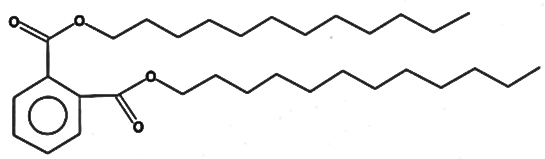  Didodecyl phthalate | 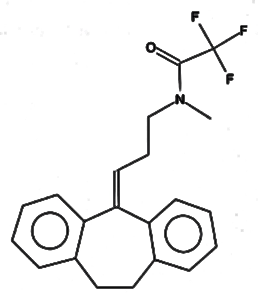  Acetamide, N-[3-(10,11-dihydro-5H-dibenzo [a,d] cyclohepten-5-ylidene)propyl] -2,2,2-triflouro-N-methyl |
|  | 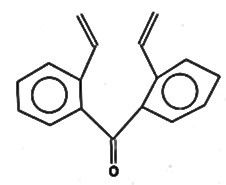  2,2’-Divinylbenzophenone | 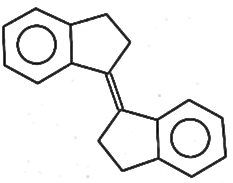  Trans-1, 1’-Bibenzoindanylidene | 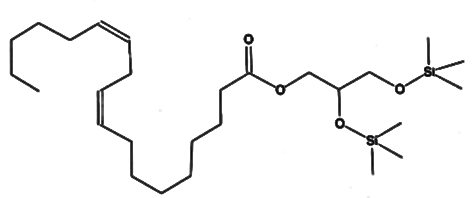  1-Monolinoleoylglycerol trimethylsilyl ether |
| *T. umkowaani* | 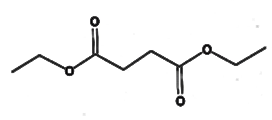  Butanedioic acid diethyl ester | 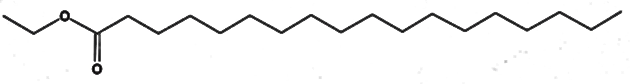  Octadecanoic acid, ethyl ester | 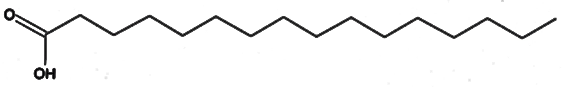  N-Hexadecanoic acid |
|  | 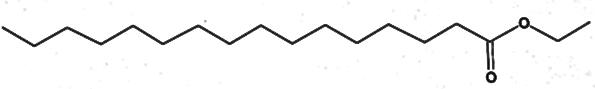  Hexadecanoic acid, ethyl ester | 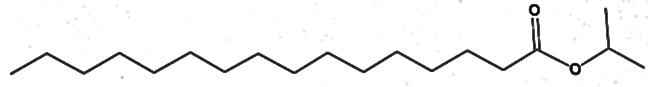  i-Propyl hexadecanoate | 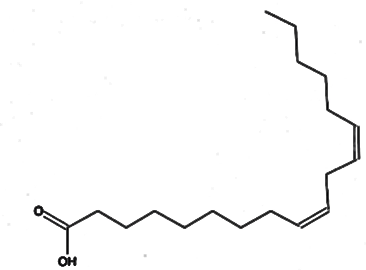  9,12-Octadecadienoic acid (Z, Z)- |
|  | 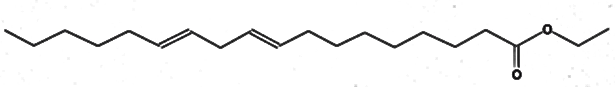  9,12-Octadecadienoic acid, ethyl ester | 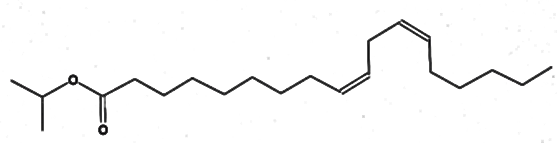  Isopropyl linoleate | 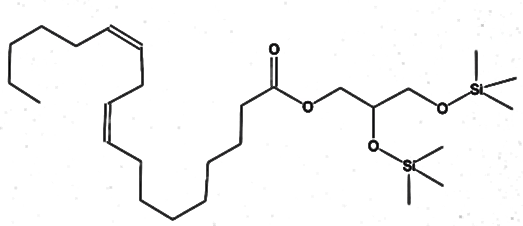  1-Monolinoleoylglycerol trimethylsilyl ether |
|  | 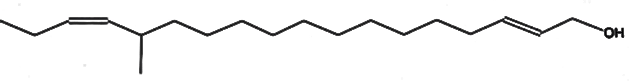  12-Methyl-E, E-2, 13-Octadecadien-1-ol | 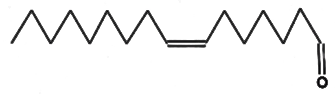  7-Hexadecenal, (Z)- | 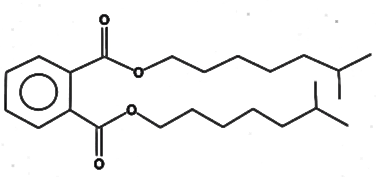  1, 2-Benzenedicarboxylic acid, diisooctyl ester |
|  | 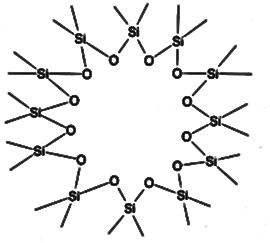  Tetracosamethyl-cyclododecasiloxane | 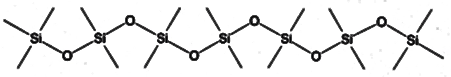  Heptasiloxane hexadecamethyl |  |
| *T. elegans* | 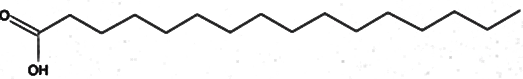  n-Hexadecanoic acid | 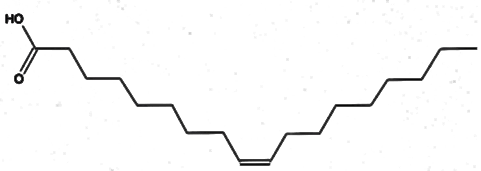  Oleic acid | 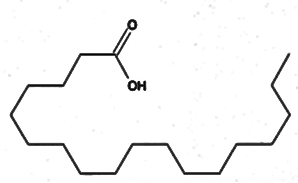  Octadecanoic acid |
| *T. versicolor* | 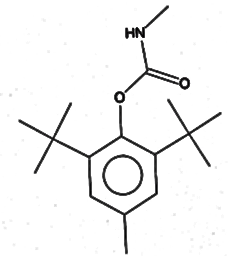  Phenol, 2,6-bis (1,1-dimethyl ethyl)-4- methyl, methylcarbamate | 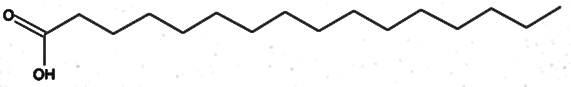  N-Hexadecanoic acid | 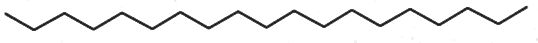  Nonadecane |
|  | 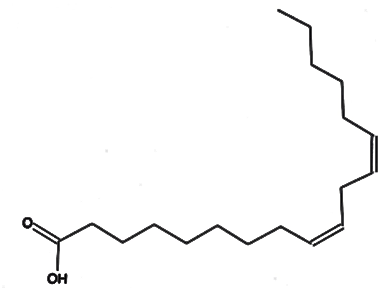  9,12-Octadecadienoic (Z, Z)- | 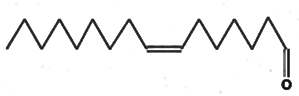  7-Hexadecenal, (Z)- | 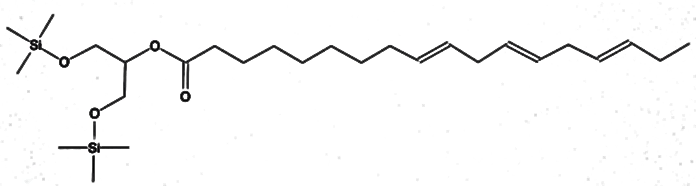  9,12,15-Octadecatrienoic acid, 2-[(trimethylsilyl) oxy]-1-[[(trimethylsilyl) oxy] methyl] ethyl ester (Z, Z, Z)- |
|  | 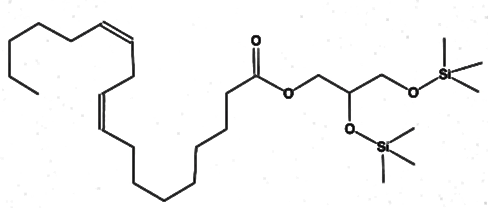  1-Momolinoleoylglycerol trimethylsilyl ether | 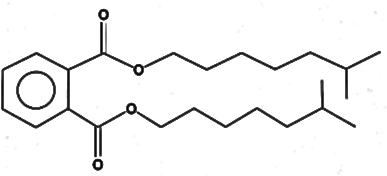  1,2-Benzenedicarboxylic acid, diisooctyl ester |  |
